# Supplementary material for: Factors Associated With Premature Exits From Supported Housing
Source: Atypon-hosted journal article supplement (doi:10.1176/appi.ps.201400311), 2015-10-15
Supplement: appi.ps.201400311.ds001.pdf [file appi.ps.201400311.ds001.pdf]

Predictor variables\* used in recursive partitioning analyses

| <b>Conceptual Framework Domain</b> | <b>Predictor Variables Included</b>                                                                                                                                                                                                                                                                                                                                                                                                                                                                                                          |
|------------------------------------|----------------------------------------------------------------------------------------------------------------------------------------------------------------------------------------------------------------------------------------------------------------------------------------------------------------------------------------------------------------------------------------------------------------------------------------------------------------------------------------------------------------------------------------------|
| Predisposing Variables             | Age, gender, race/ethnicity, marital status, vocational activities (education/employment), homelessness chronicity, criminal-justice involvement                                                                                                                                                                                                                                                                                                                                                                                             |
| Enabling Variables                 | Income, social support endorsed/denied, independence of activities of daily living (ADLs) and Instrumental ADLs (IADLs), distance from housing during supported housing application to the patient's medical home                                                                                                                                                                                                                                                                                                                            |
| Need Variables                     | Presence/absence of medical diagnoses (cancer, coronary artery disease, congestive heart failure, chronic pain, chronic obstructive pulmonary disease, diabetes, dyslipidemia, hepatitis C, stroke, HIV/AIDS, hypertension), presence/absence of psychiatric diagnoses (depression, bipolar disorder, other mood disorder, post-traumatic stress disorder (PTSD), anxiety disorder (other than PTSD), psychotic disorder, alcohol abuse/dependence, drug abuse/dependence), substance abuse severity (not present, in remission, vs. active) |
| Behavior Variables                 | Number of primary care visits, number of mental health visits, participation in substance abuse treatment, number of medical surgical admissions, number of medical surgical inpatient days, number of mental health admissions, number of mental health inpatient days, adherence to general medical outpatient care, adherence to mental health outpatient care, number of Emergency Department visits, number of contacts by housing social work staff                                                                                    |

\*Variables in the "Acuity Scale" are noted with an underline.

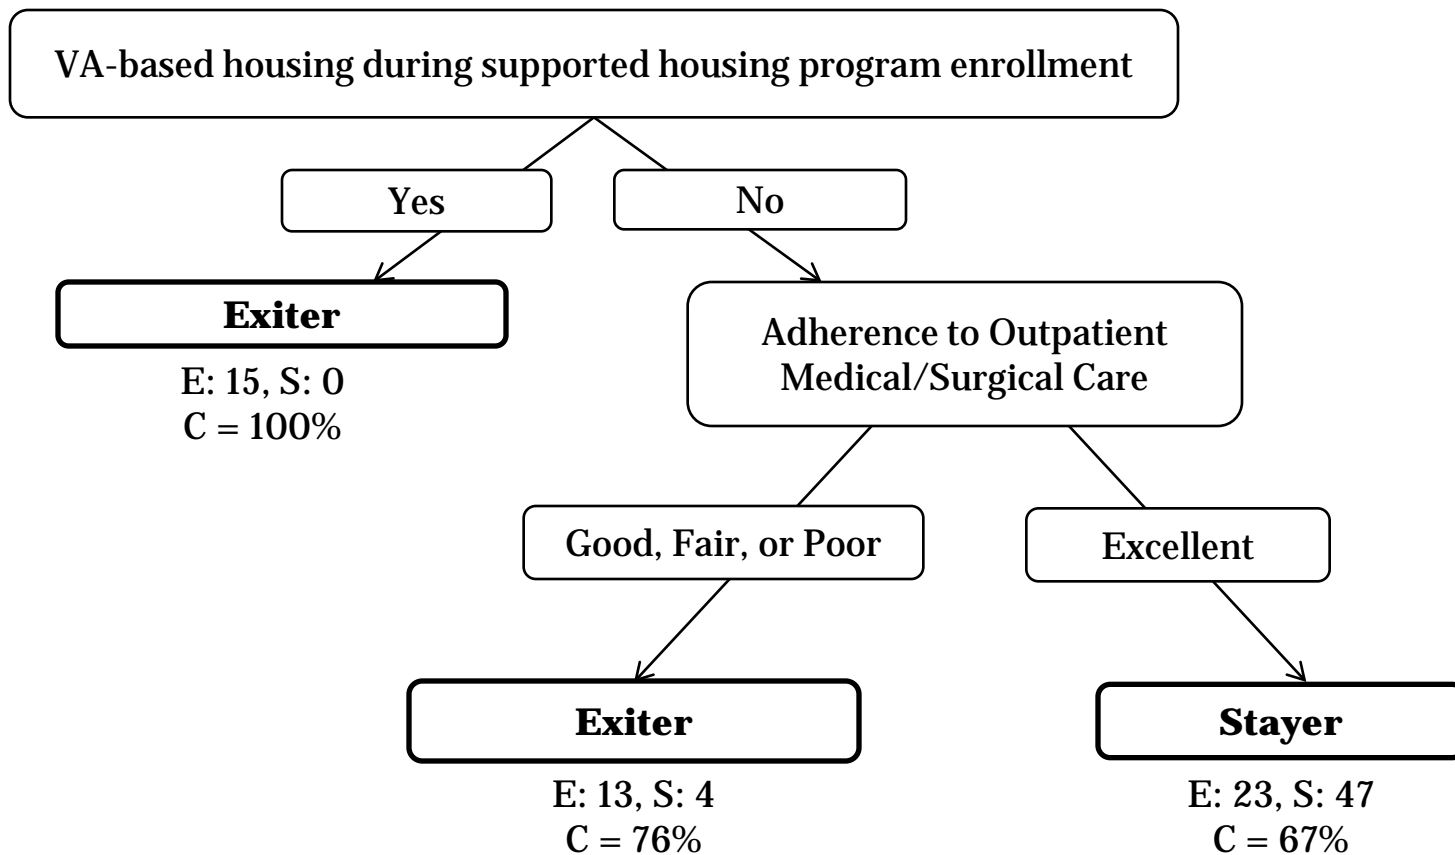

**Supplemental Data B: Classifying consumers by supported housing outcome**

Noted below each program outcome are the number of participants who exited supported housing (E) and those who stayed in supported housing (S). C = percentage of participants this model classified correctly.

*Estimation was based on 102 participants and 42 predictor variables: a complete list of predictor variables is available as Supplemental Data A. These predictors included all predisposing, enabling, need, and behavior variables described in the methods section and depicted in Figure 1.*
